# Supplementary material for: Signal, Not Poison—Screening Mint Essential Oils for Weed Control Leads to Horsemint
Source: MDPI journal article supplement (doi:10.3390/agriculture13030712), 2023-03-18
Supplement: s1 [file s1]

**Table S1.** Source plants for the essential oils from the Botanical Garden of the Karlsruhe Institute of Technology. The plants are maintained as living vouchers in clonal lines under the respective ID. Scientific taxonomy follows The Plant List ([www.theplantlist.org](http://www.theplantlist.org)). The *psbA-trnH* *igs* sequences used for genetic barcoding are deposited in GenBank under the given accession number. The identity of the plants has also been verified by comparing these accessions with curated sequences from GenBank.

| KIT ID | Declared taxonomy                                  | Vernacular names | Source      | GenBank ID for <i>psbA-trnH</i> <i>igs</i> | Identity                                    |
|--------|----------------------------------------------------|------------------|-------------|--------------------------------------------|---------------------------------------------|
| 7579   | <i>Mentha spicata</i> L.                           | Spearmint        | BG KIT      | MH753576                                   | <i>M. spec.</i>                             |
| 5391   | <i>Mentha spicata</i> L. var. <i>crispa</i>        | Curly Mint       | BG KIT      | MH753570                                   | <i>M. spicata</i> L.                        |
| 8682   | <i>Mentha longifolia</i> (L.) L.                   | Horsemint        | WEL 3/72    | MH753572                                   | <i>M longifolia</i> (L.) L.                 |
| 8680   | <i>Mentha aquatica</i> L.                          | Water Mint       | WEL 3/451   | MH753578                                   | <i>M. aquatica</i> L.                       |
| 5393   | <i>Mentha x piperita</i> L.                        | Peppermint       | BG KIT      | MH753571                                   | <i>M. x piperita</i> (L.)                   |
| 3638   | <i>Mentha suaveolens</i> Ehrh.                     | Apple Mint       | BG Vakratot | MH753574                                   | <i>M. spec.</i>                             |
| 4643   | <i>Nepeta cataria</i> L.                           | Catnip           | BG KIT      | MH753573                                   | <i>N. cataria</i> L.                        |
| 7576   | <i>Agastache rugosa</i> (Fisch. & C.A.Mey.) Kuntze | Korean Mint      | BG KIT      | MH753575                                   | <i>A. rugosa</i> (Fisch. & C.A.Mey.) Kuntze |
