# Supplementary material for: Signal, Not Poison—Screening Mint Essential Oils for Weed Control Leads to Horsemint
Source: MDPI journal article supplement (doi:10.3390/agriculture13030712), 2023-03-18
Supplement: s1 [file s1]

| <b><i>Mentha longifolia</i></b>               |      |       |
|-----------------------------------------------|------|-------|
|                                               | RI   | %     |
| 2-Hexenal, (E)-                               | 854  | 1.02  |
| alpha-Pinene                                  | 933  | 0.97  |
| beta.-Pinene                                  | 977  | 1.71  |
| beta.-Myrcene                                 | 992  | 0.94  |
| D-Limonene                                    | 1030 | 1.68  |
| cis-Ocimene                                   | 1039 | 1.43  |
| alpha terpineol                               | 1197 | 0.71  |
| 2-Hexenoic acid, 3,4,4-trimethyl-5-oxo-, (Z)- | 1234 | 0.49  |
| cis Piperitone oxide                          | 1279 | 72.37 |
| Thymol                                        | 1298 | 3.45  |
| Diosphenol                                    | 1310 | 0.51  |
| Piperitenone oxide                            | 1375 | 1.82  |
| p-Menthane-1,2,3-triol                        | 1421 | 0.50  |
| Caryophyllene                                 | 1432 | 4.02  |
| Geranyl butyrate                              | 1466 | 1.05  |
| Germacrene-D                                  | 1494 | 6.26  |
| Gamma-elemene                                 | 1509 | 0.58  |
| Delta-cadinene                                | 1533 | 0.49  |

| <b><i>Mentha piperita</i></b>    |      |       |
|----------------------------------|------|-------|
|                                  | RI   | %     |
| alpha-Pinene                     | 933  | 0.58  |
| Sabinene                         | 974  | 0.43  |
| beta-Pinene                      | 977  | 1.28  |
| beta.-Myrcene                    | 992  | 0.30  |
| alpha Terpinene                  | 1018 | 0.39  |
| Eucalyptol                       | 1034 | 8.84  |
| cis-Ocimene                      | 1039 | 0.72  |
| gamma Terpinene                  | 1061 | 0.69  |
| trans Sabinene hydrate           | 1071 | 3.53  |
| 1,6-Octadien-3-ol, 3,7-dimethyl- | 1107 | 0.47  |
| Pentyl 3-methylbutanoate         | 1109 | 0.29  |
| Menthone                         | 1167 | 29.36 |
| Isomenthol                       | 1174 | 8.52  |
| Menthol                          | 1189 | 27.86 |
| neo-Menthol                      | 1193 | 1.36  |
| Alpha-terpineol                  | 1201 | 0.83  |
| Pulegone                         | 1247 | 0.74  |
| Piperitone                       | 1262 | 1.57  |
| Menthyl acetate                  | 1297 | 2.65  |
| beta.-Bourbonene                 | 1395 | 0.59  |
| Caryophyllene                    | 1431 | 2.22  |
| beta-Faresene                    | 1459 | 0.38  |
| Germacrene-D                     | 1493 | 3.27  |
| Bicyclogermacrene                | 1508 | 0.87  |
| Veridiflorol                     | 1608 | 2.25  |

| <b><i>Mentha aquatica</i></b>          |      |       |
|----------------------------------------|------|-------|
|                                        | RI   | %     |
| 2-Hexenal, (E)-                        | 854  | 1.04  |
| alpha-Pinene                           | 934  | 1.11  |
| Sabinene                               | 975  | 0.74  |
| beta-Pinene                            | 977  | 2.46  |
| beta.-Myrcene                          | 992  | 0.95  |
| Eucalyptol                             | 1034 | 11.93 |
| cis-Ocimene                            | 1039 | 2.45  |
| 1,3,6-Octatriene, 3,7-dimethyl-, (Z)-  | 1050 | 0.51  |
| Menthofuran                            | 1176 | 43.03 |
| Menthol                                | 1180 | 0.98  |
| Benzene, 1-methoxy-2-(1-methylethenyl) | 1225 | 0.69  |
| Piperitenone oxide                     | 1380 | 19.83 |
| alpha-Gujunene                         | 1420 | 1.13  |
| Caryophyllene                          | 1432 | 4.92  |
| beta-Farnesene                         | 1459 | 1.05  |
| Epibicyclosesquiphellandrene           | 1475 | 0.52  |
| Germacrene-D                           | 1493 | 2.17  |
| Bicyclogermacrene                      | 1508 | 0.62  |
| delta-Cadinene                         | 1533 | 0.73  |
| Veridiflorol                           | 1608 | 2.65  |
| alpha-Cadinol                          | 1669 | 0.50  |

| <b><i>Mentha spicata</i></b>                  |      |       |
|-----------------------------------------------|------|-------|
|                                               | RI   | %     |
| alpha-Pinene                                  | 934  | 1.28  |
| Sabinene                                      | 975  | 0.96  |
| beta-Pinene                                   | 977  | 2.37  |
| beta-Myrcene                                  | 992  | 3.77  |
| alpha-Terpinene                               | 1018 | 0.93  |
| beta-Terpinyl acetate                         | 1034 | 9.25  |
| Eucalyptol                                    | 1035 | 4.03  |
| cis-Ocimene                                   | 1039 | 0.80  |
| gamma-Terpinene                               | 1061 | 1.46  |
| trans Sabinene hydrate                        | 1071 | 3.13  |
| Pentyl valerate                               | 1101 | 0.57  |
| Butanoic acid, 2-methyl-, 2-methylbutyl ester | 1105 | 0.78  |
| alpha-Terpineol                               | 1174 | 0.74  |
| Terpinen-4-ol                                 | 1182 | 3.13  |
| Dihydrocarvone                                | 1202 | 3.68  |
| Neodihydrocarveol                             | 1209 | 2.45  |
| trans-Carveol                                 | 1246 | 0.60  |
| Carvone                                       | 1267 | 45.93 |
| Copaene                                       | 1385 | 0.96  |
| beta-Bourbonene                               | 1396 | 3.73  |
| Caryophyllene                                 | 1432 | 3.52  |
| Epibicyclosesquiphellandrene                  | 1475 | 0.52  |
| Germacrene-D                                  | 1494 | 3.37  |
| Bicyclogermacrene                             | 1509 | 1.26  |
| delta-Cadinene                                | 1533 | 0.79  |

| <b><i>Mentha spicata crispa</i></b>                  |      |       |
|------------------------------------------------------|------|-------|
|                                                      | RI   | %     |
| alpha-Pinene                                         | 934  | 1.15  |
| Sabinene                                             | 975  | 0.59  |
| beta-Pinene                                          | 977  | 1.77  |
| beta-Myrcene                                         | 992  | 1.08  |
| d-Limonene                                           | 1033 | 9.00  |
| Eucalyptol                                           | 1034 | 4.20  |
| cis-Ocimene                                          | 1039 | 2.59  |
| 1,3,6-Octatriene, 3,7-dimethyl-, (E)-                | 1050 | 0.72  |
| trans Sabinene hydrate                               | 1071 | 0.61  |
| Borneol                                              | 1172 | 1.73  |
| Terpinen-4-ol                                        | 1182 | 1.08  |
| Dihydrocarvone                                       | 1201 | 1.26  |
| Neodihydrocarveol                                    | 1209 | 0.89  |
| Carvone                                              | 1266 | 51.64 |
| Cyclohexanol, 2-methyl-5-(1-methylethenyl)-, acetate | 1333 | 1.05  |
| trans-Carveyl acetate                                | 1367 | 1.16  |
| Copaene                                              | 1385 | 0.67  |
| beta-Bourbonene                                      | 1396 | 4.19  |
| Caryophyllene                                        | 1431 | 1.65  |
| Epibicyclosesquiphellandrene                         | 1475 | 1.57  |
| Germacrene-D                                         | 1495 | 8.00  |
| Bicyclogermacrene                                    | 1509 | 1.84  |
| Cubenol                                              | 1629 | 0.73  |
| alpha-Cadinol                                        | 1669 | 0.82  |

| <b><i>Mentha suaveolens</i></b>                              |      |       |
|--------------------------------------------------------------|------|-------|
|                                                              | RI   | %     |
| 2-Hexenal, (E)-                                              | 857  | 0.78  |
| alpha-Pinene                                                 | 934  | 1.50  |
| beta-Pinene                                                  | 977  | 3.07  |
| beta-Myrcene                                                 | 992  | 2.20  |
| d-Limonene                                                   | 1030 | 4.39  |
| cis-Ocimene                                                  | 1039 | 1.49  |
| 1,3,6-Octatriene, 3,7-dimethyl-, (Z)-                        | 1052 | 0.27  |
| Cyclohexanone, 2-(1-methylethylidene)-                       | 1143 | 0.29  |
| Benzofuran, 4,7-dimethyl-                                    | 1222 | 2.11  |
| Cuminaldehyde                                                | 1225 | 2.16  |
| Carvone                                                      | 1252 | 0.59  |
| cis Piperitone oxide                                         | 1261 | 1.37  |
| Piperitone oxide                                             | 1385 | 73.36 |
| 2-Cyclopenten-1-one, 2-(2-butenyl)-4-hydroxy-3-methyl-, (Z)- | 1413 | 0.93  |
| Epibicyclosesquiphellandrene                                 | 1475 | 1.44  |
| Germacrene-D                                                 | 1493 | 2.59  |
| cis Calamenene                                               | 1535 | 0.39  |
| tau-Cadinol                                                  | 1655 | 0.24  |
| alpha-Cadinol                                                | 1669 | 0.83  |

| <b><i>Nepeta cataria</i></b>                                        |      |       |
|---------------------------------------------------------------------|------|-------|
|                                                                     | RI   | %     |
| 2-Hexenal, (E)-                                                     | 853  | 1.81  |
| Eucalyptol                                                          | 1032 | 0.23  |
| cis-Ocimene                                                         | 1040 | 0.52  |
| 1,3,6-Octatriene, 3,7-dimethyl-, (E)-                               | 1049 | 1.71  |
| Menthofuran                                                         | 1167 | 3.37  |
| Cyclopenta[c]pyran-1(4aH)-one,<br>5,6,7,7a-tetrahydro-4,7-dimethyl- | 1389 | 77.30 |
| Cyclohexanone, 2,5-dimethyl-2-(1-methylethenyl)-                    | 1411 | 1.42  |
| alpha-Gurjunene                                                     | 1421 | 0.75  |
| Caryophyllene                                                       | 1434 | 6.94  |
| beta-Farnesene                                                      | 1459 | 0.86  |
| alpha-Humulene                                                      | 1467 | 0.54  |
| Germacrene-D                                                        | 1494 | 1.06  |
| Bicyclogermacrene                                                   | 1509 | 0.36  |
| 2'-Hydroxy-4',5'-dimethylacetophenone                               | 1513 | 0.24  |
| delta-Cadinene                                                      | 1533 | 0.50  |
| Caryophyllene oxide                                                 | 1600 | 0.54  |
| Veridiflorol                                                        | 1609 | 1.57  |
| alpha-Cadinol                                                       | 1670 | 0.28  |

| <b><i>Agastache rugosa</i></b>                   |      |       |
|--------------------------------------------------|------|-------|
|                                                  | RI   | %     |
| 2-Hexenal, (E)-                                  | 857  | 0.71  |
| alpha-Pinene                                     | 934  | 0.79  |
| beta-Pinene                                      | 977  | 2.39  |
| beta-Myrcene                                     | 993  | 0.65  |
| Eucalyptol                                       | 1033 | 10.15 |
| cis-Ocimene                                      | 1039 | 2.47  |
| 1,3,6-Octatriene, 3,7-dimethyl-, (E)-            | 1051 | 0.54  |
| Menthofuran                                      | 1174 | 60.33 |
| Menthol                                          | 1183 | 0.55  |
| Benzofuran, 4,7-dimethyl-                        | 1223 | 0.40  |
| Carvone                                          | 1250 | 1.79  |
| Cyclohexanone, 2,5-dimethyl-2-(1-methylethenyl)- | 1372 | 0.64  |
| beta-Bourbonene                                  | 1394 | 0.50  |
| alpha-Gurjunene                                  | 1420 | 1.28  |
| Caryophyllene                                    | 1431 | 6.47  |
| Beta-farnesene                                   | 1459 | 1.15  |
| Germacrene-D                                     | 1493 | 2.39  |
| Bicyclogermacrene                                | 1508 | 0.89  |
| Delta-cadinene                                   | 1532 | 0.98  |
| Veridiflorol                                     | 1608 | 3.16  |
| tau-Muurolol                                     | 1656 | 0.70  |
| alpha-Cadinol                                    | 1669 | 1.07  |
